# Supplementary material for: Removal of a frameshift between the hsdM and hsdS genes of the EcoKI Type IA DNA restriction and modification system produces a new type of system and links the different families of Type I systems
Source: PubMed Central journal article supplement (PMC3510504; doi:10.1093/nar/gks876), 2012-09-23
Supplement: supp_gks876_nar-01881-v-2012-File003.pdf [file supp_gks876_nar-01881-v-2012-File003.pdf]

### Supplementary data

Removal of a frameshift between the *hsdM* and *hsdS* genes of the EcoKI Type IA DNA restriction-modification (RM) system produces a new type of RM system and explains the origins of the different families of Type I RM systems.

Gareth A. Roberts<sup>1,+</sup>, Kai Chen<sup>1,+</sup>, Laurie P. Cooper<sup>1,+</sup>, John H. White<sup>1,+</sup>, Garry W. Blakely<sup>2</sup>, David T.F. Dryden<sup>1,\*</sup>

<sup>1</sup> EastChem School of Chemistry, The University of Edinburgh, The King's Buildings, Edinburgh, EH9 3JJ, UK.

<sup>2</sup> Institute of Cell Biology, School of Biological Sciences, The University of Edinburgh, The King's Buildings, Edinburgh EH9 3JR, UK.

Supplementary Figure S1. *E. coli* NM679 ( $r^+m^-s^-$ ) transformed with pJFMS and pBS17 (R subunit) or pMSFusion and pBS17. Phage  $\lambda v.o$  at various dilutions was then spotted on each strain.

|                                |    | <i>E. coli</i> NM679 ( $r^+m^-s^-$ ) transformed with: |               |           |                   |
|--------------------------------|----|--------------------------------------------------------|---------------|-----------|-------------------|
| Phage $\lambda$ spot dilutions |    | pJFMS                                                  | pJFMS + pBS17 | pMSFusion | pMSFusion + pBS17 |
| -1                             | -2 |                                                        |               |           |                   |
| -3                             | -4 |                                                        |               |           |                   |
| -5                             | -6 |                                                        |               |           |                   |
| -7                             | -8 |                                                        |               |           |                   |

Supplementary Figure S2. *E. coli* NM679 ( $r^+m^-s^-$ ) transformed with pJFMS or pMSFusion. Phage  $\lambda v.k$  and  $\lambda v.o$  were then spotted on these strains at various dilutions.

|                                |    | <i>E. coli</i> NM679 ( $r^+m^-s^-$ ) transformed with: |               |               |               |
|--------------------------------|----|--------------------------------------------------------|---------------|---------------|---------------|
|                                |    | pJFMS                                                  |               | pMSFusion     |               |
| Phage $\lambda$ spot dilutions |    | $\lambda v.k$                                          | $\lambda v.o$ | $\lambda v.k$ | $\lambda v.o$ |
| -1                             | -2 |                                                        |               |               |               |
| -3                             | -4 |                                                        |               |               |               |
| -5                             | -6 |                                                        |               |               |               |
| -7                             | -8 |                                                        |               |               |               |

Supplementary Figure S3. *E. coli* NM679 ( $r^{-}m^{-}s^{-}$ ) transformed with plasmids pBS17 (HsdR subunit) and pJFMS, pBS17 and pMSFusion, and with pBS17 alone, was spotted with phage  $\lambda$ v.k. The eop was identical for pBS17+pJFMS, pBS17+pMSFusion and pBS17.

| <i>E. coli</i> NM679 ( $r^{-}m^{-}s^{-}$ ) transformed with: |                   |       |                                |    |
|--------------------------------------------------------------|-------------------|-------|--------------------------------|----|
| pBS17 + pJFMS                                                | pBS17 + pMSFusion | pBS17 | Phage $\lambda$ spot dilutions |    |
|                                                              |                   |       | -1                             | -2 |
|                                                              |                   |       | -3                             | -4 |
|                                                              |                   |       | -5                             | -6 |
|                                                              |                   |       | -7                             | -8 |

Supplementary Figure S4. Purification of MSFusion by column chromatography as visualised by Coomassie Blue staining of SDS-PAGE gels.

250,150,100,75,50,37,25,20,15,10

Purification step 1 - DEAE Column. M = Marker (250, 150, 100, 75, 50, 37, 25, 20, 15, 10 kDa), CE = Cell Extract, Lanes 1-12 are elution fractions from the salt gradient. Pooled fractions 3 and 4 for the heparin column.

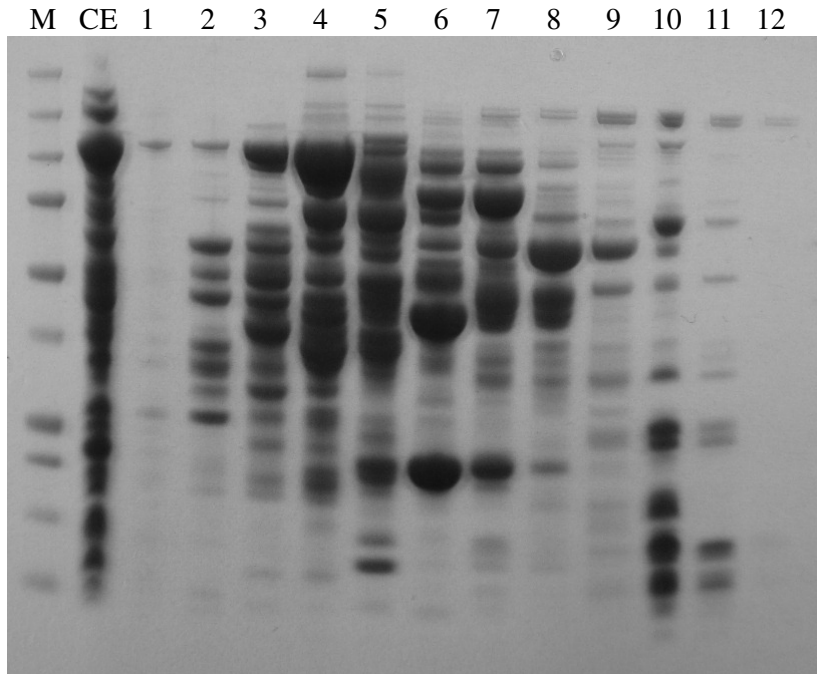

Purification step 2 - Heparin Affinity Column. M = Marker (kDa as above), D = DEAE pooled sample, FT = unbound material from heparin column. Lanes 1-12 are elution fractions from the salt gradient. Pooled fractions 8 to 11 as pure MSFusion.

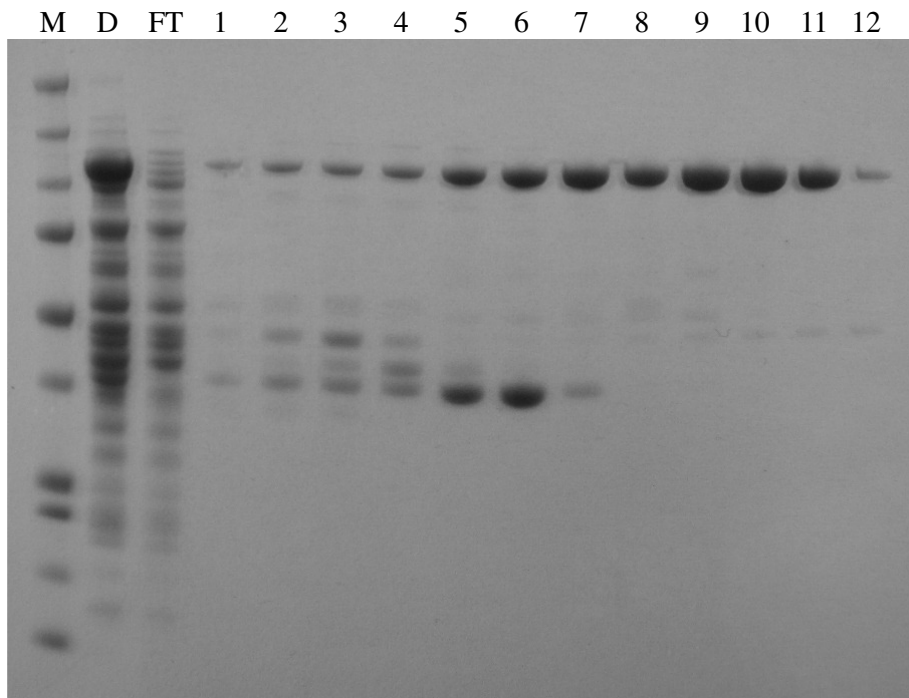

Supplementary figure S5. a. Amino acid sequences of the C-terminus of M subunit fused to N-terminus of S subunit for EcoKI and EcoR124I. The sequence in red is from the M subunit and in black from the S subunit. b. BLAST output using the fused EcoKI sequence from part a. pulls out the central conserved region of an S subunit in *Fusobacterium nucleatum*. c. BLAST output using the fused EcoR124I sequence from part a. pulls out the central conserved region of several S subunits from different bacteria.

a.

```
>MS.EcoKI
DSEENKNTDQ HLAISRWRKF SREWIRTAKS DSLDISWLKD KDSIDADSLP EPDVLAAEAM GELVQALSEL DALMRELGAS DEADLQRQLL
EEAFGGVKE MSAGLPEGW VIAPVSTVTT LIRGVTYKKE QAINYLKDDY LPLIRANNIQ NGKFDTTDLV FVPKNLVKES QKISPEDIVI
AMSSGSKSVV GKSAHQHLPF

>MS.EcoR124I
QVFASKEDVA HLAKSVAFET VVANDYNLSV SSVVEAKDNR EIIDIAELNA ELKTTVSKID QLRKDIDAIV AEIEGCEVQK MSEMSEYLEKL
LDGVEVEWLP LGEITKYEQP TKYLVKAKDY HDTYITPVLV AGKTFILGYT NETHGIYQAS KAPVIFDDF TTANKWVDFD FKAASSAMKM
```

b.

```
ref|ZP_02273165.1|type I restriction modification enzyme protein S [Fusobacterium
nucleatum subsp. polymorphum ATCC 10953]
Length=387
```

```
Score = 52.4 bits (124), Expect = 3e-05, Method: Compositional matrix adjust.
Identities = 47/201 (23%), Positives = 87/201 (43%), Gaps = 22/201 (10%)
```

```
Query 34 ENKNTDQHLATSRRWRKFSREWIRTAKSDSLDISWLKDKDSIDADSLPEPDVLAAEAMGEL 93
+NKN D + A S ++ I +K S + + P++ + + +
Sbjct 107 KNKNVDLLYLYFYLTKIKNNLESIASSTTVKII---NKSSFKEKIEISLPNLEIQKKISKK 163

Query 94 VQAL-SELDALMRELGASDEADLQRQLLEEAFFGGVKEMSAGLPEGWVIAPVSTVTTLIR 152
++ L + +D +L E L + L FG +K + W I + +I
Sbjct 164 LELLENNIDFRKNQLNYLKE--LNKSLFTRMFGDIKTND-----KNWKIVKLEKYINIIG 216

Query 153 GVTYKKEQAINYLKDDYLPLIRANNIQNGKFDTTDLVFPKNLVKESQKISPEDIVIAM 212
G +K K +PLIR NI +G+F +T+LVF+ +N E K+ P DI+I+++
Sbjct 217 GYAFKNID---FKSSGIPLIRIGNINSGQFKSTNLVFIENKKFEKFKVFPNDILISLT 272

Query 213 S-----GSKSVVGKSAHQH 226
G+ ++G S ++
Sbjct 273 GTVGKDDYGNACILGDSYSEY 293
```

c.

```
ref|ZP_00682365.1| similar to Restriction endonuclease S subunits [Xylella fastidiosa
Ann-1]
```

```
Score = 122 bits (306), Expect = 2e-26, Method: Compositional matrix adjust.
Identities = 78/158 (49%), Positives = 91/158 (57%), Gaps = 28/158 (17%)
```

```
Query 64 NDYNLSVSSVVEAKDREI IDIAELNAELKTTVSKIDQLRKDIDAIVAEIEGCEVQKMSE 123
D L +A N E D AE N T ++ ID+L I A+ E
Sbjct 95 RDALLRFGGSTDASNGE--DGAERNQWKPTGINWIDEL---IAALCPE----- 138

Query 124 MSTYLEKLLDGVEVEWLPPLGEITKYEQPTKYLKAKDYHDTYITPVLTAGKTFILGYTNET 183
GVE + L GE+ YEQP KYLV + Y ++Y PVLTAG+TFILGYT+ET
Sbjct 139 -----GVEFKML--GELLDYEQPGKYLVA STAYDNSYWTPVLTAGQTFILGYTDET 187

Query 184 HGIYQAS-KAPVIFDDFTTANKWVDFDFKAKSSAMKM 220
GIY AS + PVIFDDFTTA KWVDF FKAASSAMKM
Sbjct 188 SGIYAASPEPVIIFDDFTTAFKWVDFPFKAKSSAMKM 225
Red is the M.EcoR124I sequence
```

### Supplementary figure 5 c cont.

ref|YP\_001181695.1| restriction modification system DNA specificity domain [Shewanella putrefaciens CN-32]

Score = 118 bits (296), Expect = 2e-25, Method: Compositional matrix adjust.  
Identities = 74/149 (49%), Positives = 96/149 (64%), Gaps = 14/149 (9%)

```
Query 83 IDIAELNAELKTTVSKI-DQLRKDIDAIVAEIEGCEVQKMSEMSYL----EKLLD----G 133
          IDI L + K ++KI K I I+ + QK + M L ++LLD
Sbjct 157 IDIPPLPEQRK--IAKILSTWDKAISTTERLIDNSKQKKALMQQLLTAKKRLDDDSGKP 214

Query 134 VEVEW--LPLGEITKYEQPTKYLKAKDYHDYTYTIPVLTAGKTFILGYTNETHGIYQASK 191
          E EW + LG++ Y+QPT YLVK+ DY + Y+IPVLTAGKTFILGY+NE GI++ +
Sbjct 215 FEGEWTKVELGKLLDYKQPTPYLVKSTDYSNEYSIPVLTAGKTFILGYSNENFGIFE-EE 273

Query 192 APVIFDDFFTANKWVDFDFKAKSSAMKM 220
          P IIFDDFTTA+K+VDF FKAKSSAMK+
Sbjct 274 LPAIIFFDDFTTASKFVDFPFKAKSSAMKI 302
Red is the M.EcoR124I sequence
```

ref|NP\_858129.1| putative type i restriction hsds subunit [Lactobacillus delbrueckii subsp. lactis]

Score = 111 bits (278), Expect = 3e-23, Method: Compositional matrix adjust.  
Identities = 62/141 (43%), Positives = 90/141 (63%), Gaps = 9/141 (6%)

```
Query 85 IAELNAELKTTVSKIDQLRKDIDAIVAEIEGCEVQKM--SEMSYLEKLLDGVVEVEW--LP 140
          IA +EL T ++ ++ ++ + + + + +QKM + Y +G EW
Sbjct 171 IANFFSELDTAITLHEEKKQQLKCLKSAL----LQKMFAYKSGYPAIRFEGFSDEWEQCK 226

Query 141 LGEITKYEQPTKYLKAKDYHDYTYTIPVLTAGKTFILGYTNETHGIYQAS-KAPVIFDD 199
          LGE+ YEQPTKY+VK+ +Y D + PVLTAGK+F+LGYT+E GI A+ + PV+IFDD
Sbjct 227 LGEVFNYEQPTKYIVKSTEYDDNFNTPVLTAGKSFLGYTDEISGIKNATVENPVVIFDD 286

Query 200 FTTANKWVDFDFKAKSSAMKM 220
          FTT + +VDF FK KSSAMK+
Sbjct 287 FTTDSHYVDFPFKIKSSAMKL 307
Red is the M.EcoR124I sequence
```
